# Supplementary material for: Ultralong lifespan of SuperRedox Capacitor using Ti-doped Li3V2(PO4)3 cathode with suppressed vanadium dissolution
Source: Royal Society of Chemistry journal article supplement (doi:10.1039/d3ta06240f), 2023-12-11
Supplement: d3ta06240f1.pdf [file d3ta06240f1.pdf]

## Electronic Supplementary Information (ESI)

### Ultralong lifespan of SuperRedox Capacitor using Ti-doped $\text{Li}_3\text{V}_2(\text{PO}_4)_3$ cathode with suppressed vanadium dissolution

*Yuta Harada<sup>a</sup>, Naohisa Okita<sup>a,\*</sup>, Masahiro Fukuyama<sup>a</sup>, Etsuro Iwama<sup>a,b,c</sup>, Wako Naoi<sup>d</sup>, and  
Katsuhiko Naoi<sup>a,b,c,\*</sup>*

<sup>a</sup> Department of Applied Chemistry, Tokyo University of Agriculture & Technology, 2-24-16 Naka-cho, Koganei, Tokyo 184-8558, Japan

<sup>b</sup> Global Innovation Research Organization, Tokyo University of Agriculture & Technology, 2-24-16 Naka-cho, Koganei, Tokyo, 184-8588 Japan

<sup>c</sup> Advanced Capacitor Research Center, Tokyo University of Agriculture & Technology, 2-24-16 Naka-cho, Koganei, Tokyo 184-8558, Japan

<sup>d</sup> Division of Art and Innovative Technologies, K & W Inc., 1-3-16-901 Higashi, Kunitachi, Tokyo 186-0002, Japan

\* Corresponding Authors: [n-okita@go.tuat.ac.jp](mailto:n-okita@go.tuat.ac.jp) / [k-naoi@cc.tuat.ac.jp](mailto:k-naoi@cc.tuat.ac.jp)

**Thermogravimetry (TG) analyses of LVP and M(Ti, Al, and Mn)-doped LVP/MWCNT composites**

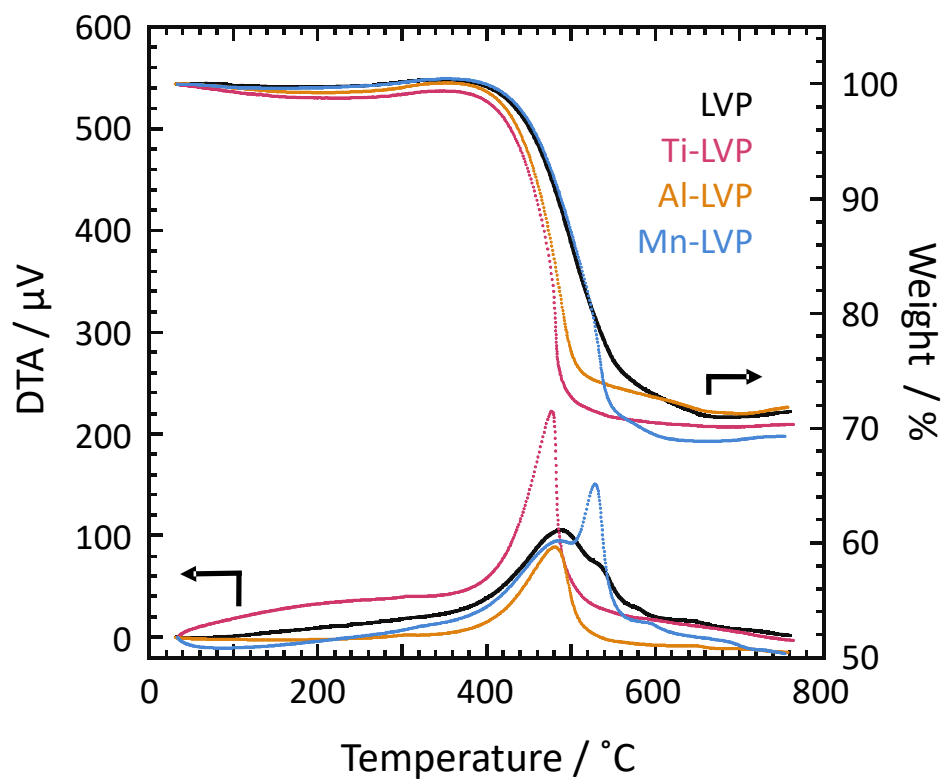

Figure S1. TG thermograms of the LVP, Ti-LVP, Al-LVP and Mn-LVP. The measurements were performed at a sweep rate of  $5^{\circ}\text{C min}^{-1}$  from ambient temperature to  $750^{\circ}\text{C}$  under a synthetic air atmosphere.

### Lattice parameters of LVP/MWCNT composites (LVP, Ti-LVP, Al-LVP, and Mn-LVP)

Table S1. The lattice parameters (a, b, c, and V) of LVP/MWCNT composites (LVP, Ti-LVP, Al-LVP, and Mn-LVP). Lattice parameters were calculated by Rietveld refinement.

|        | a          | b          | c           | $\beta$    | V          | $R_{wp}$ |
|--------|------------|------------|-------------|------------|------------|----------|
| LVP    | 8.5935(15) | 8.6105(14) | 12.068(2)   | 90.399(14) | 893.0(3)   | 12.91    |
| Ti-LVP | 8.5963(7)  | 8.6195(7)  | 12.0573(11) | 89.594(4)  | 893.38(12) | 11.26    |
| Al-LVP | 8.5769(16) | 8.5862(15) | 12.036(2)   | 90.309(12) | 886.4(3)   | 11.79    |
| Mn-LVP | 8.592(2)   | 8.6164(19) | 12.083(3)   | 90.312(15) | 894.5(4)   | 7.61     |

## Charge and discharge behaviour of $\text{Li}_3\text{V}_2(\text{PO}_4)_3$

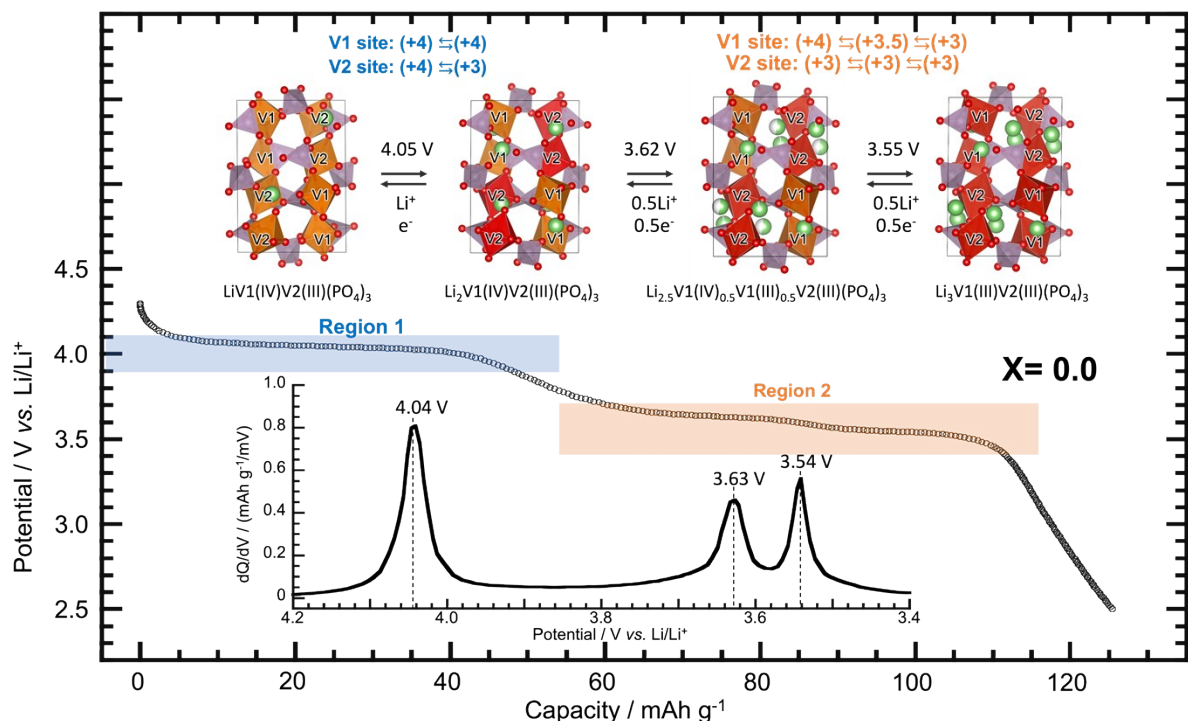

Figure S2. [confirmation with previous works] The potentials at which each phase shift have been characterized by  $dQ/dV$  vs. potential plot shown in the inset. There observed three peaks at 4.04, 3.63, and 3.54 V. In Region 1, the redox with  $1e^-/1\text{Li}^+$  occurs around 4.05V, while in Region 2, two consecutive redox reactions with each  $0.5e^-/0.5\text{Li}^+$  occur. The behavior is well consistent with the admitted LVP mechanism that have been previously reported.<sup>1</sup> Postulated crystal structure and their transition for the of pristine (Ti-unsubstituted: X=0)  $\text{Li}_3\text{V}_2(\text{PO}_4)_3$  during discharge are described with multiple/stepwise electron and  $\text{Li}^+$  transport.

# Refined structural parameters of $\text{Li}_{2.9}\text{V}_{1.9}\text{Ti}_{0.1}(\text{PO}_4)_3$

Table S2. Summary of neutron diffraction data for  $\text{Li}_{2.9}\text{V}_{1.9}\text{Ti}_{0.1}(\text{PO}_4)_3$  and its Rietveld refinement.

| space group                                            | $a / \text{\AA}$ | $b / \text{\AA}$ | $c / \text{\AA}$ | $V / \text{\AA}^3$ |           |
|--------------------------------------------------------|------------------|------------------|------------------|--------------------|-----------|
| $P2_1/n$                                               | 8.5961(13)       | 8.6130(13)       | 12.0393(2)       | 891.3508           |           |
|                                                        | $x/a$            | $y/b$            | $z/c$            | $B_{\text{iso}}$   | Occupancy |
| Li(1)                                                  | 0.2845(11)       | 0.3016(11)       | 0.3267(9)        | 0.2068(3)          | 1.0000(3) |
| Li(2)                                                  | 0.5606(13)       | 0.4169(14)       | 0.1857(9)        | 0.5396(3)          | 0.9092(3) |
| Li(3)                                                  | 0.9183(12)       | 0.3092(11)       | 0.2334(8)        | 0.2237(2)          | 1.0000(3) |
| O(1)                                                   | 0.4262(4)        | 0.0934(4)        | 0.3331(3)        | 0.3892(7)          | 1         |
| O(2)                                                   | 0.9266(4)        | 0.1069(5)        | 0.1446(3)        | 0.8878(8)          | 1         |
| O(3)                                                   | 0.3512(4)        | 0.4854(4)        | 0.2618(3)        | 0.5226(7)          | 1         |
| O(4)                                                   | 0.8025(4)        | 0.4996(4)        | 0.2177(3)        | 0.4428(7)          | 1         |
| O(5)                                                   | 0.1725(5)        | 0.0494(4)        | 0.0430(3)        | 0.4983(7)          | 1         |
| O(6)                                                   | 0.6465(5)        | 0.0804(4)        | 0.4739(3)        | 0.8156(8)          | 1         |
| O(7)                                                   | 0.4449(4)        | 0.3613(5)        | 0.0655(3)        | 0.5511(7)          | 1         |
| O(8)                                                   | 0.9286(4)        | 0.3269(4)        | 0.4092(3)        | 0.2321(6)          | 1         |
| O(9)                                                   | 0.1649(4)        | 0.1671(4)        | 0.4299(3)        | 0.4378(7)          | 1         |
| O(10)                                                  | 0.6137(4)        | 0.1354(5)        | 0.0745(3)        | 0.6825(8)          | 1         |
| O(11)                                                  | 0.1673(4)        | 0.2684(5)        | 0.1852(3)        | 0.7682(8)          | 1         |
| O(12)                                                  | 0.6411(4)        | 0.2937(5)        | 0.3219(3)        | 0.6973(7)          | 1         |
| P(1)                                                   | 0.1111(5)        | 0.0989(6)        | 0.1478(4)        | 0.5824(8)          | 1         |
| P(2)                                                   | 0.6029(5)        | 0.1153(5)        | 0.3519(3)        | 0.5828(7)          | 1         |
| P(3)                                                   | 0.0343(4)        | 0.2477(6)        | 0.4914(4)        | 0.2898(7)          | 1         |
| V(1)                                                   | 0.2461           | 0.4606           | 0.1072           | 0.5                | 0.9       |
| V(2)                                                   | 0.7534           | 0.4703           | 0.3943           | 0.5                | 1         |
| Ti                                                     | 0.2461           | 0.4606           | 0.1072           | 0.5                | 0.1       |
| $R_{wp} = 5.35, R_p = 3.94, R_e = 1.45, \chi^2 = 3.69$ |                  |                  |                  |                    |           |

## Charge and discharge behavior of $\text{Li}_{3-x}\text{V}_{2-x}\text{Ti}_x(\text{PO}_4)_3$

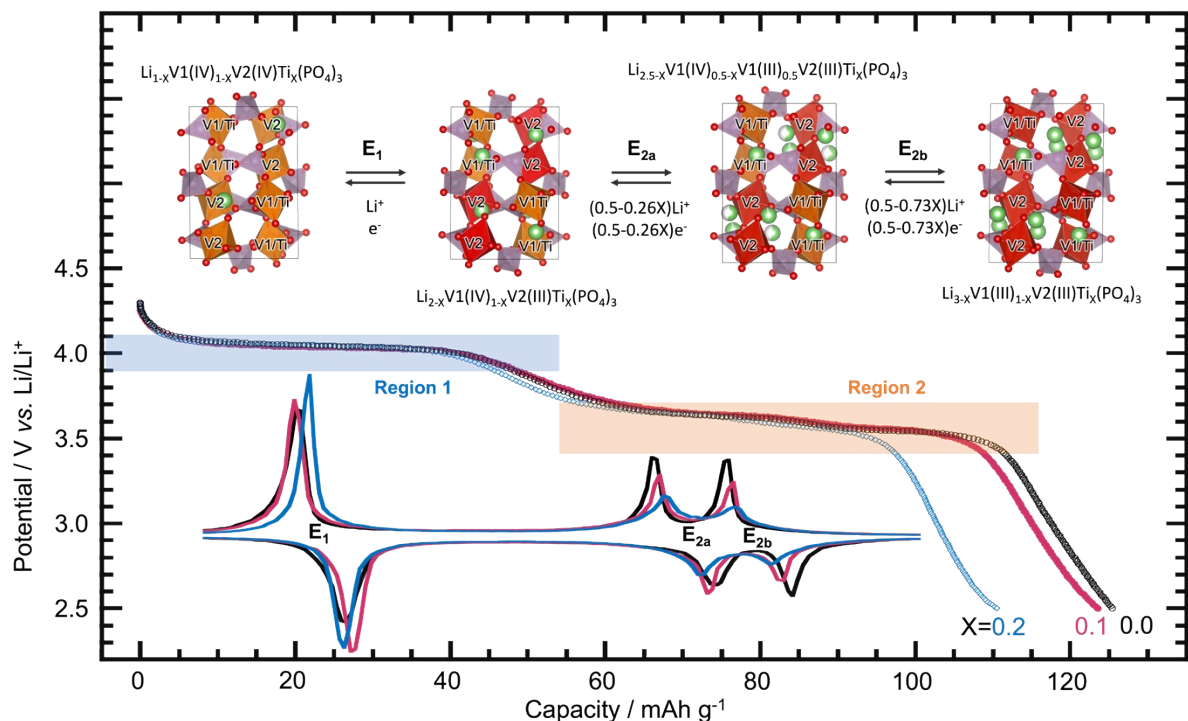

Figure S3. The same discharge curves (as in Fig.4) and their corresponding  $dQ/dV$  plots are shown, where three redox couples at around the potentials of  $E_{R1}$ ,  $E_{R2a}$ , and  $E_{R2b}$  are observed. Focusing on the region 2 potential, the intensities decrease by  $X$  for the two peaks around  $E_{R2a}$  and  $E_{R2b}$ . This instantly corresponds the decrease in capacity in the discharge curves. Based on previously reported literature <sup>1</sup>, a proposed  $\text{Li}_{3-x}\text{V}_{2-x}\text{Ti}_x(\text{PO}_4)_3$  mechanism is suggested for better understanding the multiple redox with consecutive phase transition composed of two different vanadium sites (V1 and V2).

**TEM images of  $\text{Li}_3\text{V}_2(\text{PO}_4)_3/\text{MWCNT}$  and  $\text{Li}_{2.9}\text{V}_{1.9}\text{Ti}_{0.1}(\text{PO}_4)_3/\text{MWCNT}$  before and after immersion in hot water.**

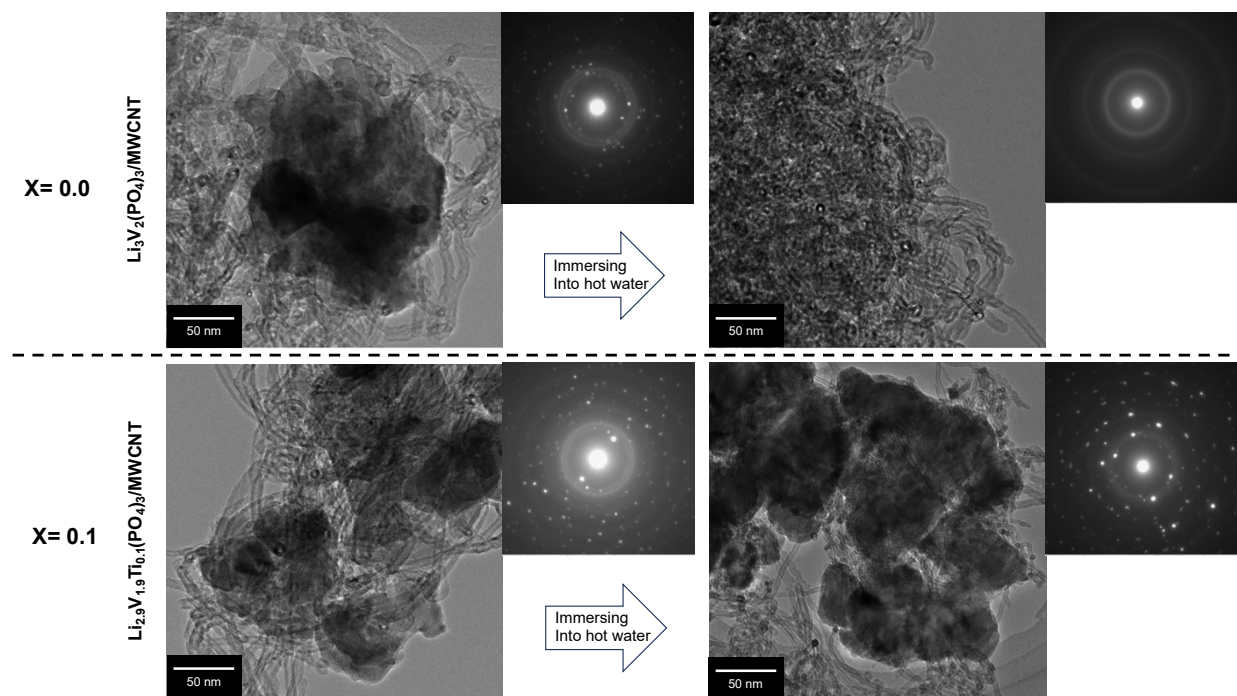

Figure S4. TEM images and their Electron Diffraction (ED) of  $\text{Li}_{3-X}\text{V}_{2-X}\text{Ti}_X(\text{PO}_4)_3/\text{MWCNT}$  composites for  $X = 0.0$  (upper) and  $0.1$  (lower). The figure compares those two key features before and after immersion of each sample into hot water ( $60^\circ\text{C}$ ; 47h). After immersion in hot water, the pristine LVP ( $X=0.0$ ) particles completely disappear and only MWCNTs are observed, moreover no diffraction spots in ED; this indicates that the crystal particles are possibly dissolved. In contrast, for Ti-substituted LVP ( $X=0.1$ ) particles are observed even after immersion in hot water and diffraction spots are observed also in the ED. In contrast, at  $X=0.1$ , LVP particles are observed even after immersion in warm water and diffraction spots are observed even in the ED.

**High resolution TEM images of  $\text{Li}_3\text{V}_2(\text{PO}_4)_3$  and  $\text{Li}_{2.9}\text{V}_{1.9}\text{Ti}_{0.1}(\text{PO}_4)_3$ .**

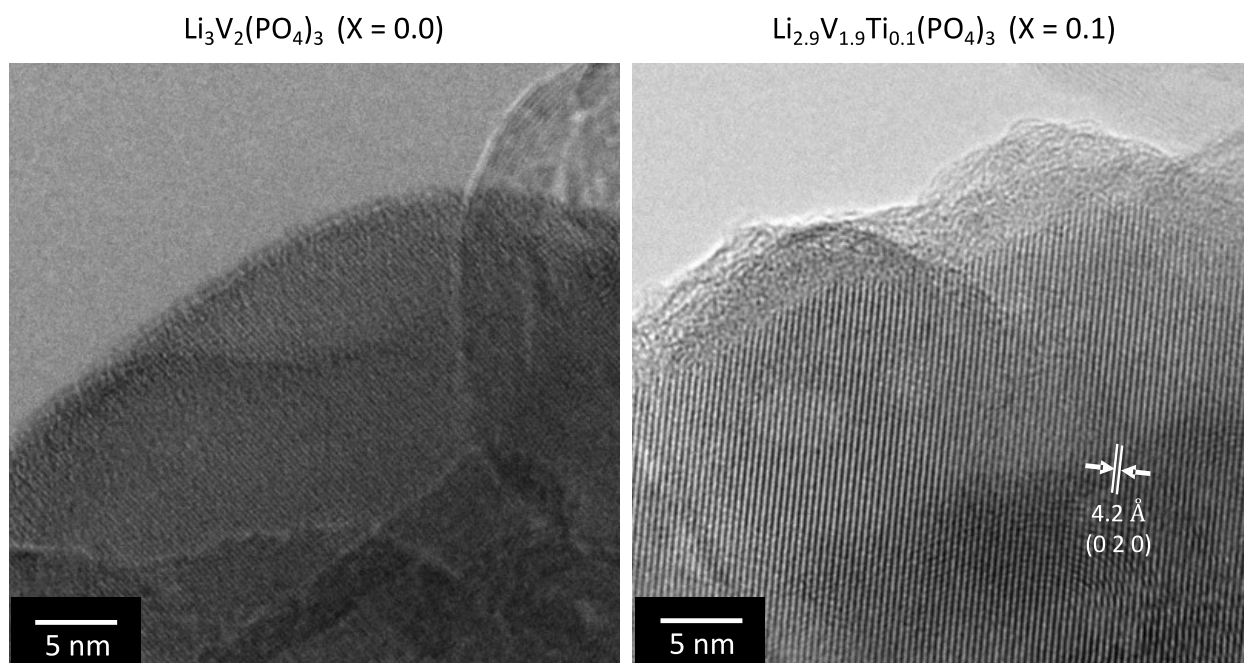

Figure S5. Magnified HRTEM image of  $\text{Li}_3\text{V}_2(\text{PO}_4)_3/\text{MWCNT}$  (right) and  $\text{Li}_{2.9}\text{V}_{1.9}\text{Ti}_{0.1}(\text{PO}_4)_3/\text{MWCNT}$  (left) demonstrate a clear crystal lattice aligned along the (020) plane. In addition, an amorphous phase is observed at 2-3 nm on the surface of  $\text{Li}_{2.9}\text{V}_{1.9}\text{Ti}_{0.1}(\text{PO}_4)_3/\text{MWCNT}$ .



**Composition of  $\text{Li}_{2.9}\text{V}_{1.9}\text{Ti}_{0.1}(\text{PO}_4)_3/\text{MWCNTs}$  on the surface and bulk as determined by STEM and EDX.**

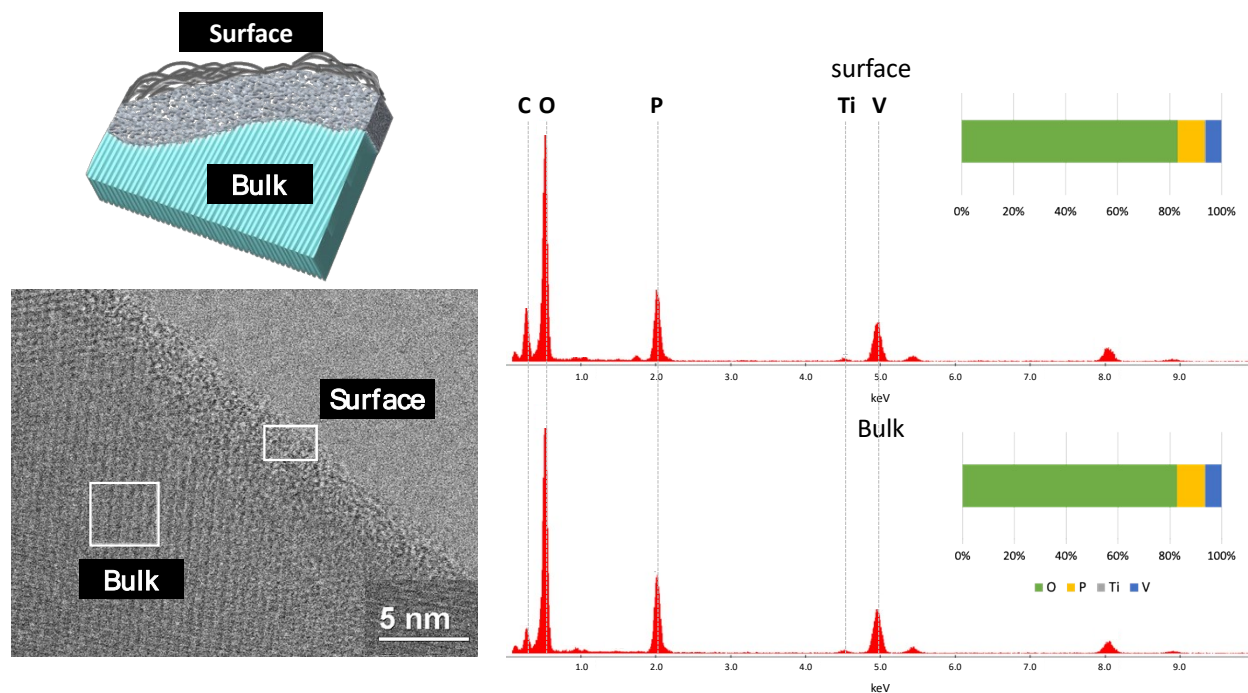

Figure S6. Inside the particle (bulk), lattice pattern corresponding to the face spacing of LVP is observed, and on the surface, an amorphous layer of about 2 nm is observed. EDX of the box shown in the STEM image (corresponding to Surface and Bulk) shows peaks of C, O, P, Ti, and V in each region, all of which are derived from  $\text{Li}_{2.9}\text{V}_{1.9}\text{Ti}_{0.1}(\text{PO}_4)_3/\text{MWCNT}$ . In addition, there is no difference in the elemental ratios, indicating that the elemental species and ratio are almost the same on the surface and in the bulks.

**Investigation of the degradation states of electrodes after 10,000 cycles full cell cycling of Li//LTO and Li//LVP cells**

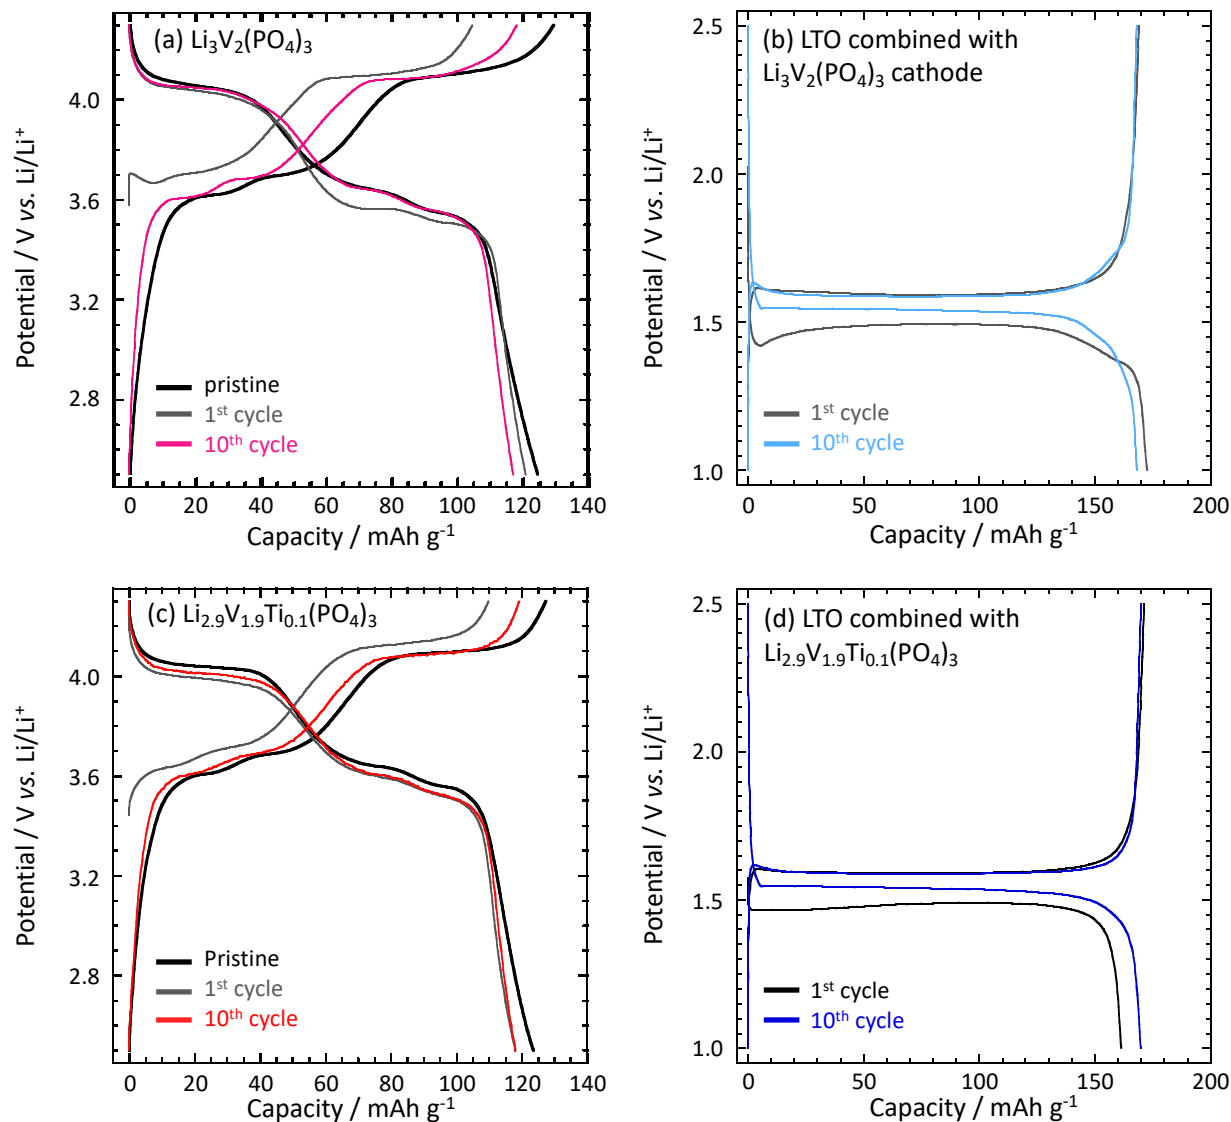

Figure S7. Charge discharge curves of  $\text{Li}_3\text{V}_2(\text{PO}_4)_3$ ,  $\text{Li}_{2.9}\text{V}_{1.9}\text{Ti}_{0.1}(\text{PO}_4)_3$  and LTO for initial and 10th cycles of Li metal half cells reassembled by using electrodes removed from the full cells after 10,000 cycles: (a)  $\text{Li}_3\text{V}_2(\text{PO}_4)_3$  and (b) LTO after 10,000 cycling of full cell without any pretreatment (no preconditioning) and (c)  $\text{Li}_{2.9}\text{V}_{1.9}\text{Ti}_{0.1}(\text{PO}_4)_3$  and (d) LTO after 10,000 cycling of full cell.

**Comparison of Cycle performance of LTO//( $\text{Li}_{3-x}\text{V}_{2-x}\text{Ti}_x(\text{PO}_4)_3$  ( $x = 0$  and  $0.1$ ) full cells at different C-rates**

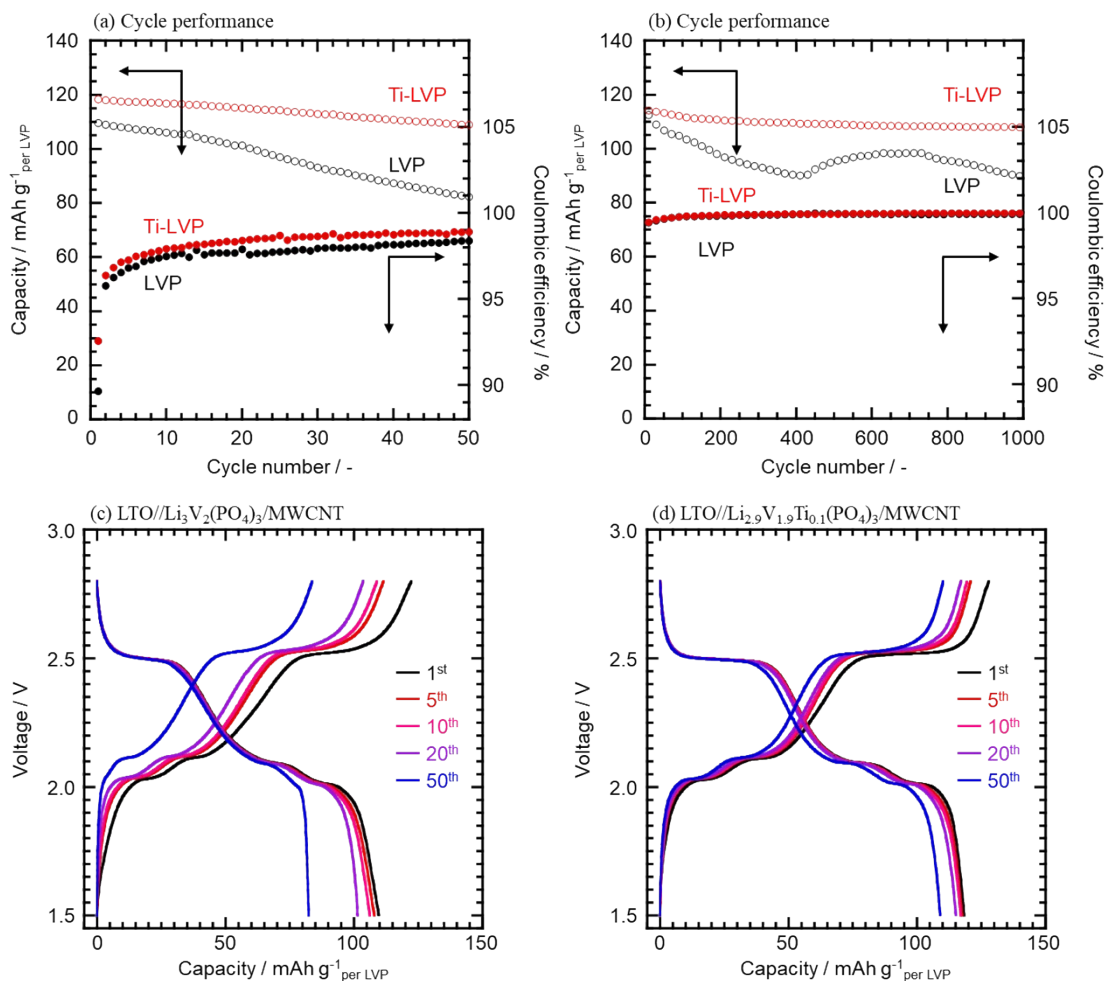

**Figure S8.** Plots of capacity against the cycle of LTO//( $\text{Li}_{3-x}\text{V}_{2-x}\text{Ti}_x(\text{PO}_4)_3$  ( $x = 0$  and  $0.1$ ) full cells. (a) 50 cycles at  $0.5\text{C}/0.5\text{C}$  rate; (b) 1000 cycles at  $10\text{C}/10\text{C}$  rate ( $1\text{C} = 131.5 \text{ mA g}^{-1}$  per LVP). Charge/discharge curves of (c) LTO// $\text{Li}_3\text{V}_2(\text{PO}_4)_3$  and (d) LTO// $\text{Li}_{2.9}\text{V}_{1.9}\text{Ti}_{0.1}(\text{PO}_4)_3$  full-cell at  $0.5\text{C}$ -rate. For  $X = 0.0$ , the low-potential plateau ( $0.5\text{Li}^+$ ,  $2.02 \text{ V}$ ) decreases continuously, and this plateau almost disappears after 50 cycles. For  $X = 0.1$ , there is no marked change in the charge/discharge curve after 50 cycles.

### Rate performance of LTO// $\text{Li}_3\text{V}_2(\text{PO}_4)_3$ and LTO// $\text{Li}_{2.9}\text{V}_{1.9}\text{Ti}_{0.1}(\text{PO}_4)_3$ full cell

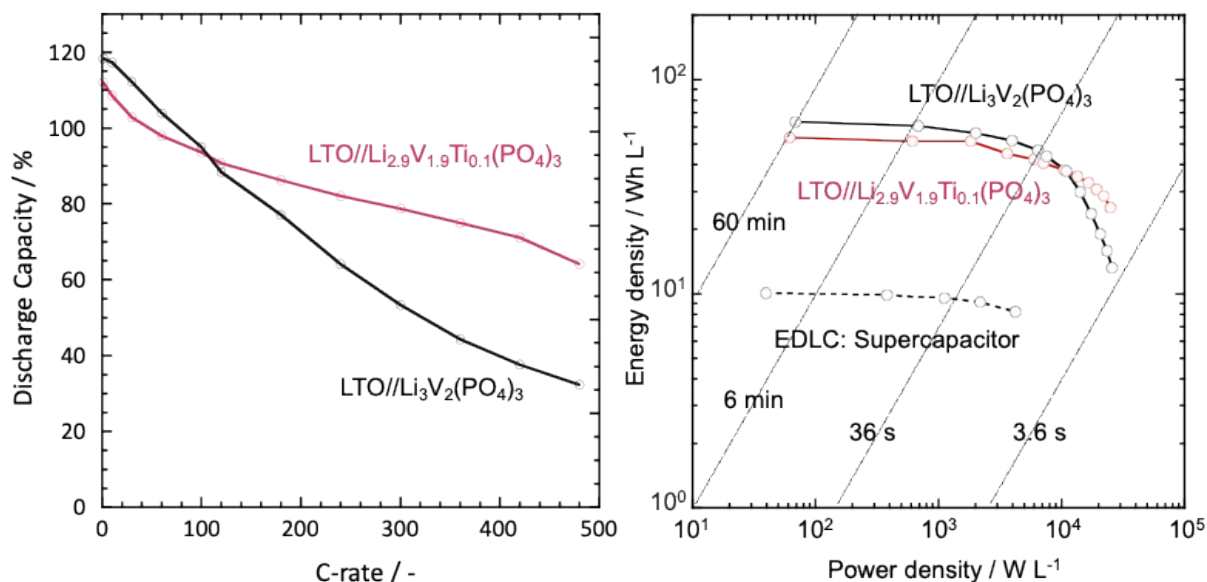

**Figure S9.** The tested LTO//  $\text{Li}_{2.9}\text{V}_{1.9}\text{Ti}_{0.1}(\text{PO}_4)_3$  system exhibits excellent discharge C-rate capability (left); 94 mAh g<sup>-1</sup> at 100C, and then 79 mAh g<sup>-1</sup> at 300C, corresponding to the 83 and 70% of the capacity obtained at 1C. Ragone plots of our full cells LTO// $\text{Li}_3\text{V}_2(\text{PO}_4)_3$ , LTO// $\text{Li}_{2.9}\text{V}_{1.9}\text{Ti}_{0.1}(\text{PO}_4)_3$  and supercapacitor: SC [AC/1 M TEMABF<sub>4</sub>/PC/AC] (right). All the volumetric capacity was calculated based on total volume of two electrodes. LTO//  $\text{Li}_{2.9}\text{V}_{1.9}\text{Ti}_{0.1}(\text{PO}_4)_3$  full cells exhibit high volumetric energy density of 51.4-53.6 Wh L<sup>-1</sup> within the region of low power requirement (100 – 2,000 W L<sup>-1</sup>) which corresponds to the 5-folds volumetric energy density of SC.<sup>2</sup> Even at a higher power (2,000 – 25,000 W L<sup>-1</sup>), 50% of the energy density (25.3-51.6 Wh L<sup>-1</sup>) can be maintained.

**XPS spectra for two different kinds of cathodes( $\text{Li}_3\text{V}_2(\text{PO}_4)_3$  and  $\text{Li}_{2.9}\text{V}_{1.9}\text{Ti}_{0.1}(\text{PO}_4)_3$ ) and anode( $\text{Li}_4\text{Ti}_5\text{O}_{12}$ :LTO)**

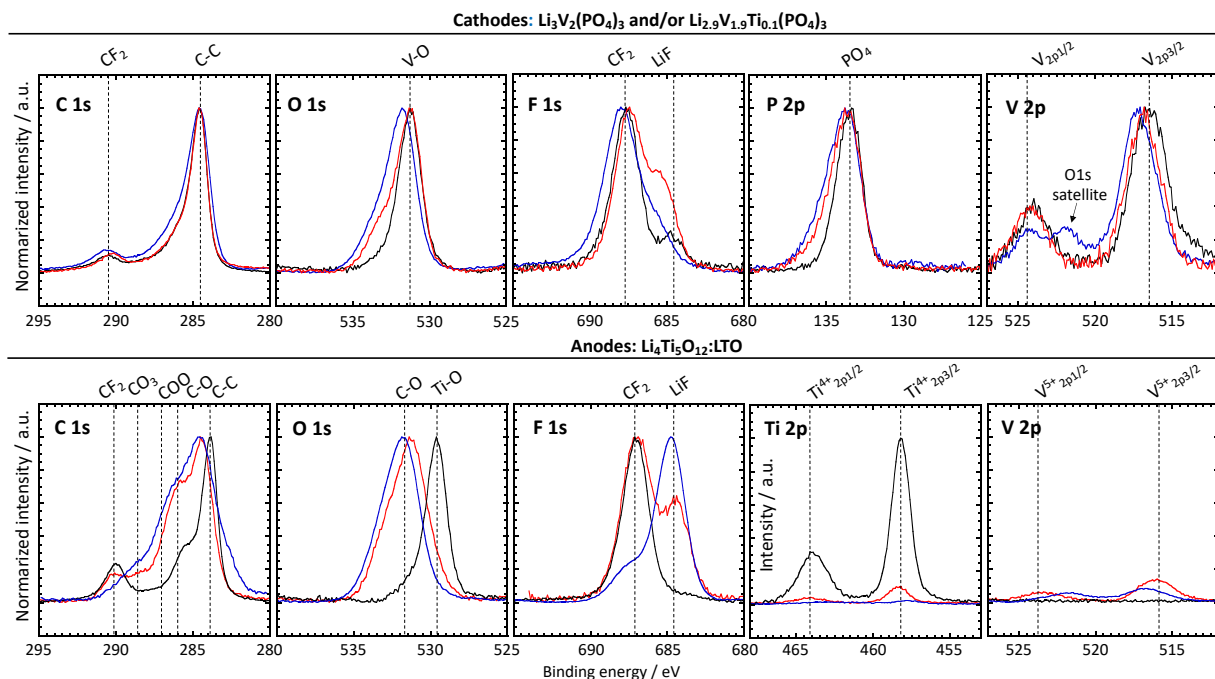

**Figure S10.** XPS spectra for (upper) two different kinds of cathodes ( $\text{Li}_3\text{V}_2(\text{PO}_4)_3$  and  $\text{Li}_{2.9}\text{V}_{1.9}\text{Ti}_{0.1}(\text{PO}_4)_3$ ) and (lower) anode ( $\text{Li}_4\text{Ti}_5\text{O}_{12}$ : LTO). The upper spectra have been obtained in various conditions: (black) is a pristine  $\text{Li}_{2.9}\text{V}_{1.9}\text{Ti}_{0.1}(\text{PO}_4)_3$  before cycling, (blue) represents  $\text{Li}_3\text{V}_2(\text{PO}_4)_3$  after 10,000 cycles and (red)  $\text{Li}_{2.9}\text{V}_{1.9}\text{Ti}_{0.1}(\text{PO}_4)_3$  after 10,000 cycles. Likewise, the lower spectra show the XPS spectra for anodes (LTO) under different conditions: (black) Pristine LTO, (blue) LTO anode after 10,000 cycles (w/ $\text{Li}_3\text{V}_2(\text{PO}_4)_3$  cathode), and (red) LTO anode after 10,000 cycles (w/ $\text{Li}_{2.9}\text{V}_{1.9}\text{Ti}_{0.1}(\text{PO}_4)_3$  cathode). In Cathode, a peak corresponding to LiF was observed at 684.5 eV in the F 1s spectra of both  $\text{Li}_3\text{V}_2(\text{PO}_4)_3$  and  $\text{Li}_{2.9}\text{V}_{1.9}\text{Ti}_{0.1}(\text{PO}_4)_3$  after 10,000 cycles, indicating that LiF is formed as the electrolyte decomposition. In the spectra of  $\text{Li}_3\text{V}_2(\text{PO}_4)_3$  after 10,000 cycles, a peak is observed at 520 eV, but this is considered a satellite peak of O1s detected and is not considered a spectral change due to capacity degradation during cycle. In the anode, peaks corresponding to C-O derived from  $\text{Li}_2\text{CO}_3$  and  $\text{ROCO}_2$ , which are electrolyte deposition, are observed in the C 1s and O 1s spectra. A peak corresponding to LiF is also observed at 684.5 eV in the F 1s spectra. In the Ti 2p spectra, although the  $\text{Ti}^{4+}$  2p 3/2 peak derived from LTO is observed in pristine LTO, its peak completely disappears in the LTO anode after 10,000 cycles (w/ $\text{Li}_3\text{V}_2(\text{PO}_4)_3$  cathode), indicating that the LTO is completely covered by deposition. On the other hand, in the LTO anode after 10,000 cycles (w/ $\text{Li}_{2.9}\text{V}_{1.9}\text{Ti}_{0.1}(\text{PO}_4)_3$  cathode),  $\text{Ti}^{4+}$  2p 3/2 peak is still observable, indicating that there are few deposition on the LTO surface. In the V 2p spectra, in both LTO anode after 10,000 cycles (w/ $\text{Li}_3\text{V}_2(\text{PO}_4)_3$  cathode) and LTO anode after 10,000 cycles (w/ $\text{Li}_{2.9}\text{V}_{1.9}\text{Ti}_{0.1}(\text{PO}_4)_3$  cathode), the  $\text{V}^{5+}$  2p1/2 peak was observed and it is thought that cathode-derived vanadium is deposited, but the peak intensity is so small so that it is hard to discuss the quantitative.

**The amount of vanadium dissolved after cycle test measured from the ICP-MS.**

Table S3. Results of ICP-MS on vanadium detection among two LTO samples and corresponding electrolytes after 1,000 cycles using  $\text{Li}_3\text{V}_2(\text{PO}_4)_3$  and  $\text{Li}_{2.9}\text{V}_{1.9}\text{Ti}_{0.1}(\text{PO}_4)_3$  as cathode.

| Cathode                                                       | Vanadium on 5.3-<br>5.8 mg of<br>$\text{Li}_4\text{Ti}_5\text{O}_{12}$ |               | Vanadium in 2,000 $\mu\text{L}$<br>(1.3 g $\text{cm}^{-3}$ ) of electrolyte |               | Total amount of<br>vanadium |
|---------------------------------------------------------------|------------------------------------------------------------------------|---------------|-----------------------------------------------------------------------------|---------------|-----------------------------|
|                                                               | ppm                                                                    | $\mu\text{g}$ | ppm                                                                         | $\mu\text{g}$ | $\mu\text{g}$               |
| $\text{Li}_3\text{V}_2(\text{PO}_4)_3$                        | 630                                                                    | 3.4           | 0.81                                                                        | 2.1           | 5.5                         |
| $\text{Li}_{2.9}\text{V}_{1.9}\text{Ti}_{0.1}(\text{PO}_4)_3$ | 320                                                                    | 1.9           | 0.88                                                                        | 2.3           | 4.1                         |

## Reference

- 1 S.-C. Yin, H. Grondy, P. Strobel, M. Anne and L. F. Nazar, *J. Am. Chem. Soc.*, 2003, **125**, 10402–10411.
- 2 K. Naoi, W. Naoi, S. Aoyagi, J.-I. Miyamoto and T. Kamino, *Acc. Chem. Res.*, 2013, **46**, 1075–1083.
